# Supplementary material
Source: publisher site journal article supplement (https://www.dovepress.com/article/321751)
Supplement: Supplementary file 1 [file get_supplementary_file.php]

**Appendix 1**

**Appendix 1: Response Phases with AI Applications**

**Notes:** Reproduced from Laudanski, K, Shea G, DiMeglio M, Rastrepo M, Solomon C. What can covid-19 teach us about using AI in pandemics?. *Healthcare*; 2020;8:1-14. © 2020 by the authors. Licensee MDPI, Basel, Switzerland. Creative Commons Attribution

(CC BY) license (http://creativecommons.org/licenses/by/4.0/).
